# Supplementary material
Source: Springer Nature journal article supplement (https://www.springermedizin.de/resource/supplementary/12916_2012_785_MOESM2_ESM.pdf/9598296)

**a**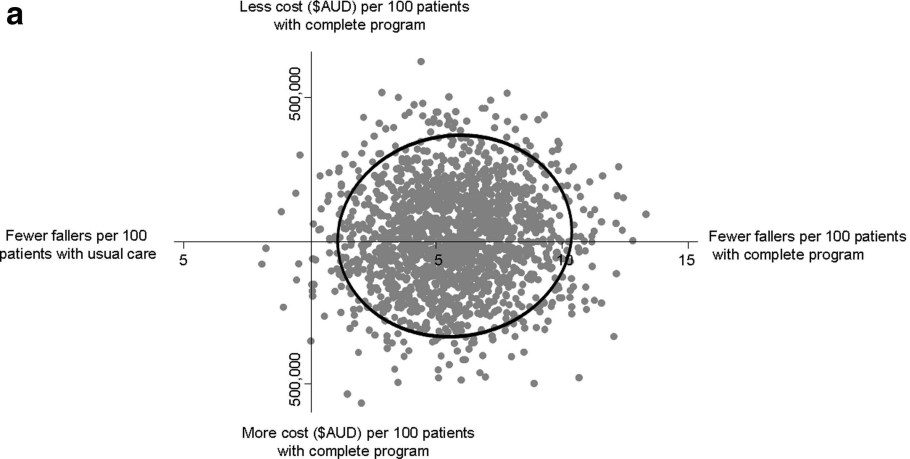**b**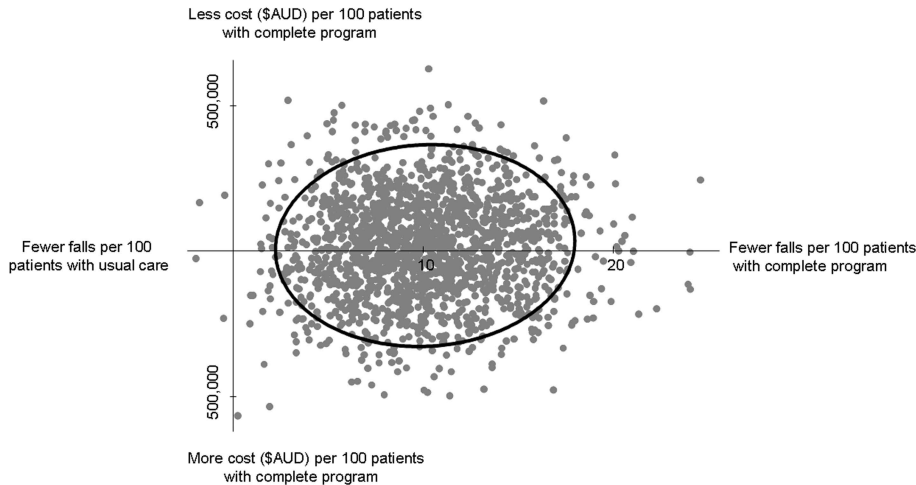

Supplement: MOESM2 [file 9598296]
